# Supplementary material for: Diagnosis of Early-Stage Idiopathic Parkinson's Disease Using High-Resolution Quantitative Susceptibility Mapping Combined with Histogram Analysis in the Substantia Nigra at 3 T
Source: PubMed Central journal article supplement — J Clin Neurol. 2017 Dec 27;14(1):90–7. doi: 10.3988/jcn.2018.14.1.90 (PMC5765262; doi:10.3988/jcn.2018.14.1.90), 2017-12-27
Supplement: jcn-14-90-s002.pdf [file jcn-14-90-s002.pdf]

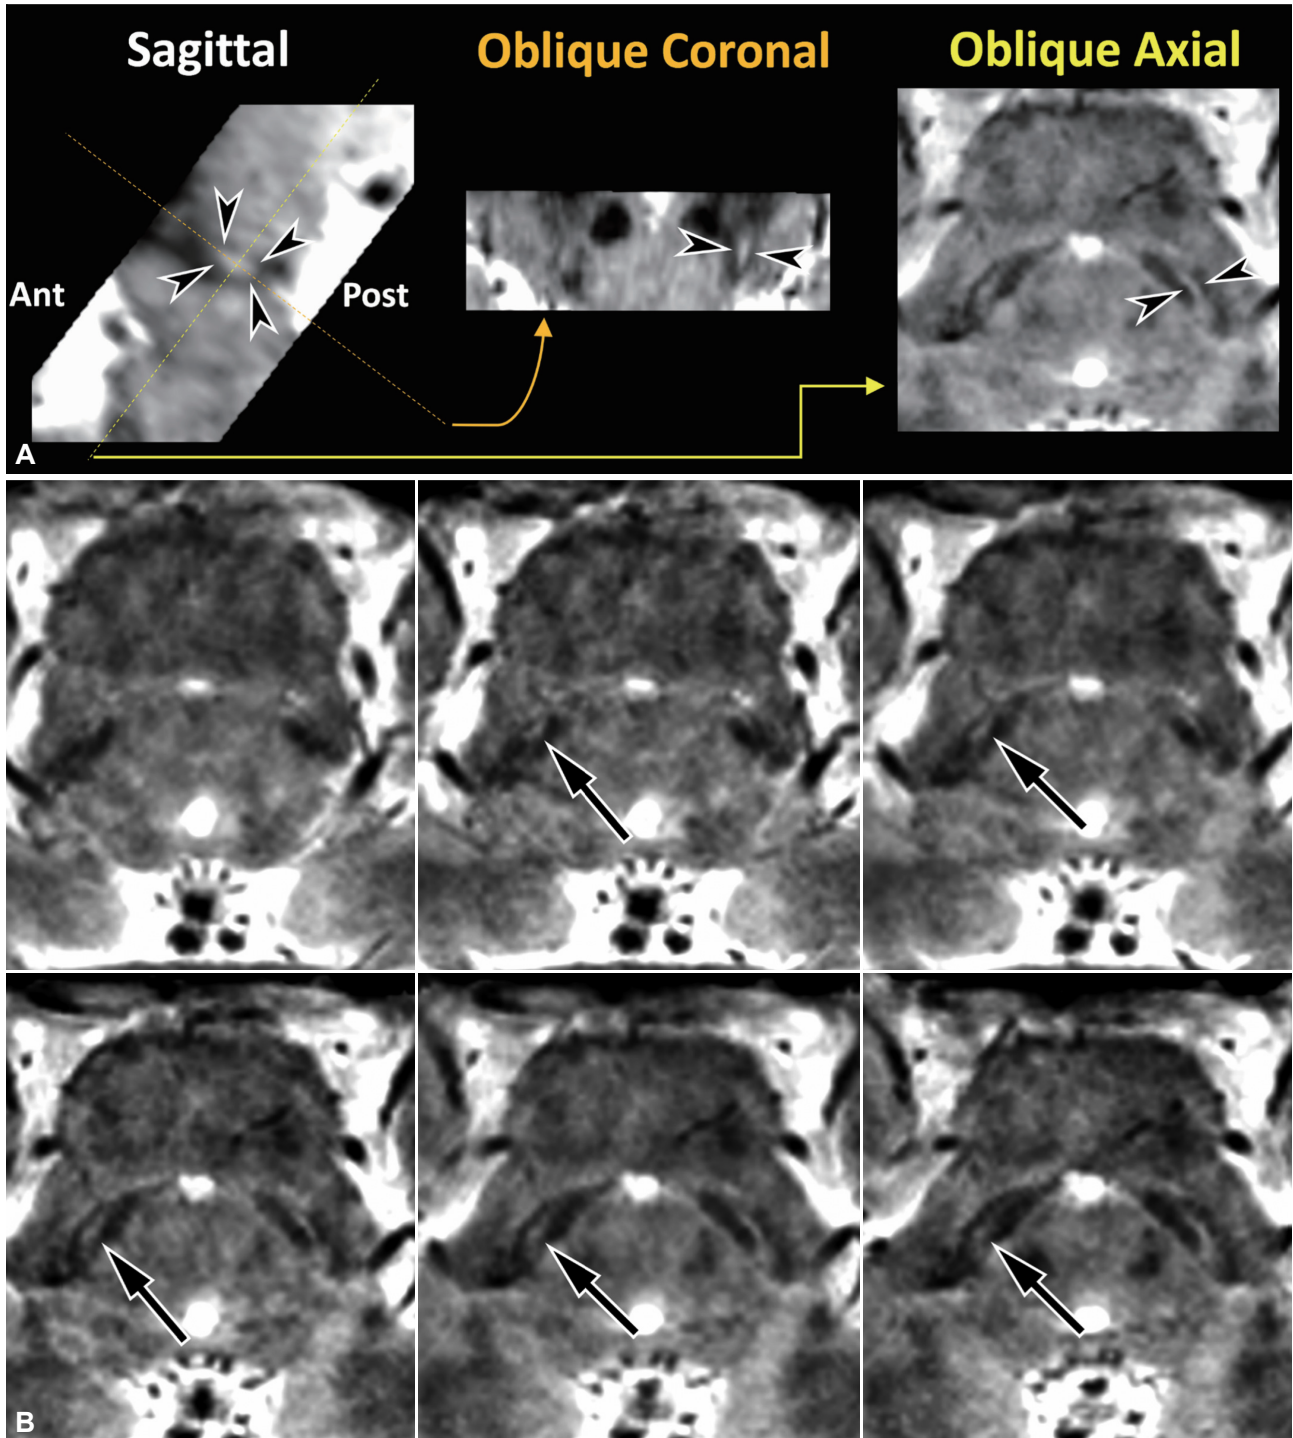

**Supplementary Fig. 1.** A: The normal nigrosome-1 (arrowheads) is located in the dorsolateral aspect of the substantia nigra in a 64-year-old healthy woman. When considering its shape (oval) and direction (almost parallel to the anterior commissure-posterior commissure line), oblique axial imaging perpendicular to the axis of the nigrosome-1 may be the best for its assessment as it minimizes the partial-volume effect. B: In a 64-year-old healthy woman, the normal nigrosome-1 (arrows) is seen in the dorsolateral aspect of the substantia nigra, showing iso- or hyperintense to the adjacent white matter.
