# Supplementary material for: Diagnosis of Early-Stage Idiopathic Parkinson's Disease Using High-Resolution Quantitative Susceptibility Mapping Combined with Histogram Analysis in the Substantia Nigra at 3 T
Source: PubMed Central journal article supplement — J Clin Neurol. 2017 Dec 27;14(1):90–7. doi: 10.3988/jcn.2018.14.1.90 (PMC5765262; doi:10.3988/jcn.2018.14.1.90), 2017-12-27
Supplement: jcn-14-90-s005.pdf [file jcn-14-90-s005.pdf]

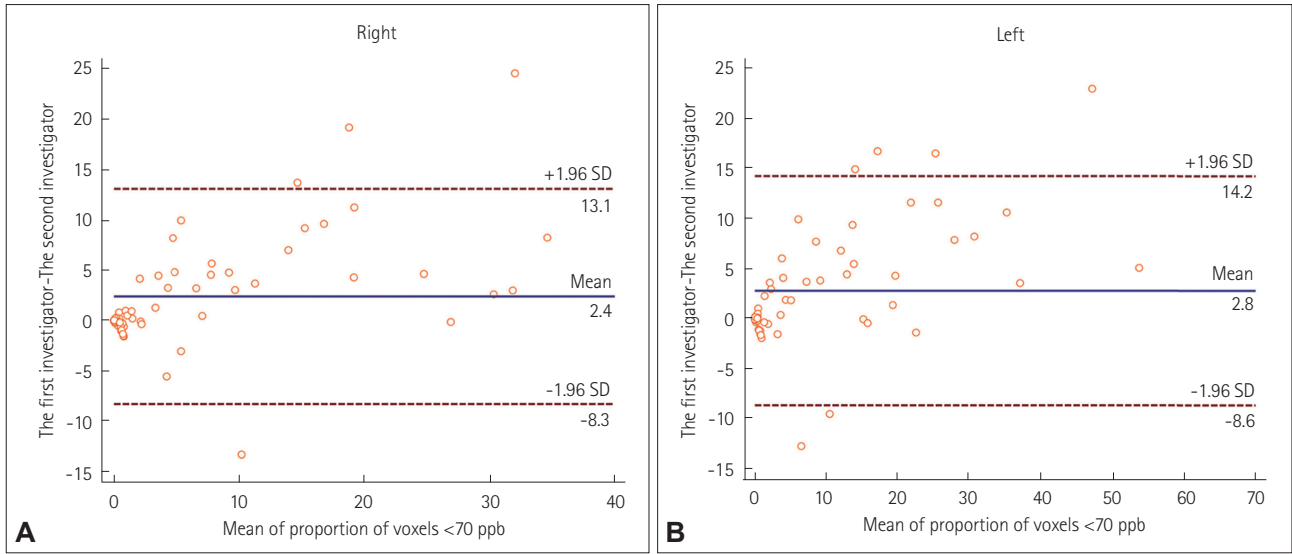

**Supplementary Fig. 4.** The Bland-Altman plots between the two investigators for the measurement of the proportion of voxels less than 70 ppb in the right (A) and left (B) substantia nigra.
