# Supplementary material for: Diagnosis of Early-Stage Idiopathic Parkinson's Disease Using High-Resolution Quantitative Susceptibility Mapping Combined with Histogram Analysis in the Substantia Nigra at 3 T
Source: PubMed Central journal article supplement — J Clin Neurol. 2017 Dec 27;14(1):90–7. doi: 10.3988/jcn.2018.14.1.90 (PMC5765262; doi:10.3988/jcn.2018.14.1.90), 2017-12-27
Supplement: jcn-14-90-s006.pdf [file jcn-14-90-s006.pdf]

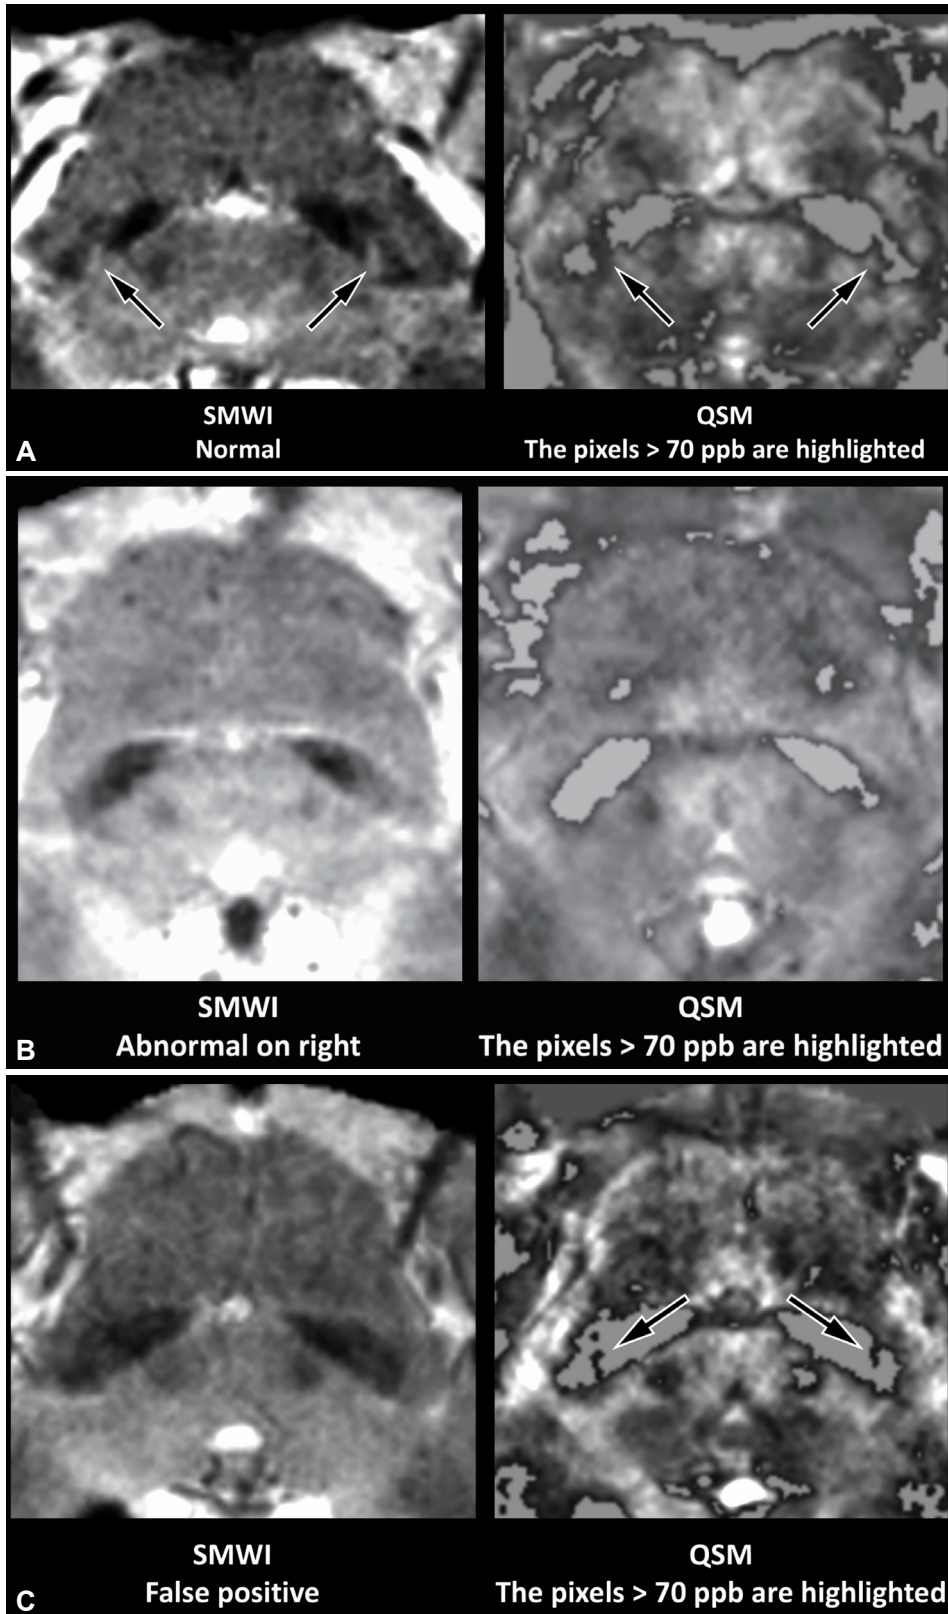

**Supplementary Fig. 5.** A: The normal-looking nigrosome-1 regions are noted on both sides on both SMWI and QSM in a 69-year-old healthy man (arrows). B: The right nigrosome-1 is not appreciated on either SMWI or QSM in a 66-year-old patient with idiopathic Parkinson's disease. C: In a 68-year-old healthy man, the bilateral nigrosome-1 regions show slight hypointensity compared to the white matter of the dorsal midbrain on SMWI, and are considered abnormal. However, there are small proportions of voxels less than 70 ppb in the regions of bilateral nigrosome-1 on QSM (arrows). QSM: quantitative susceptibility mapping, SMWI: susceptibility map-weighted imaging.
